## Review Article

# Coastal migration patterns of the four largest Barents Sea Atlantic salmon stocks inferred using genetic stock identification methods

Martin-A. Svenning <sup>1\*</sup>, Morten Falkegård<sup>1</sup>, Eero Niemelä<sup>2</sup>, Juha-Pekka Vähä<sup>3</sup>, Vidar Wennevik<sup>4</sup>, Mikhail Ozerov <sup>5</sup>, Sergey Prusov<sup>6</sup>, J. Brian Dempson<sup>7</sup>, Michael Power<sup>8</sup>, and Per Fauchald<sup>1</sup>

<sup>1</sup>Norwegian Institute for Nature Research (NINA), Tromsø, Norway

<sup>2</sup>County Governor of Finnmark (FMFI), Vadsø, Norway

<sup>3</sup>The Association for Water and Environment of Western Uusimaa, LOHJA, Finland

<sup>4</sup>Institute of Marine Research (IMR), Norway

<sup>5</sup>Department of Biology, University of Turku, Turku FI-20014, Finland

<sup>6</sup>Knipovich Polar Research Institute of Marine Fisheries and Oceanography (PINRO), Murmansk, Russia

<sup>7</sup>Fisheries & Oceans Canada, St John's, NL A1C 5X1, Canada

<sup>8</sup>Department of Biology, University of Waterloo, Waterloo, ON, N2L 3G1, Canada

\*Corresponding author: tel: + 47 93466725; fax: +47 (0) 77750401; e-mail: [martin.svenning@nina.no](mailto:martin.svenning@nina.no).

Svenning, M.-A., Falkegård, M., Niemelä, E., Vähä, J.-P., Wennevik, V., Ozerov, M., Prusov, S., Dempson, J. B., Power, M., and Fauchald, P. Coastal migration patterns of the four largest Barents Sea Atlantic salmon stocks inferred using genetic stock identification methods. – ICES Journal of Marine Science, 76: 1379–1389.

Received 21 December 2018; revised 9 April 2019; accepted 7 May 2019; advance access publication 25 June 2019.

Combining detailed temporal and spatial catch data, including catch per unit effort, with a high-resolution microsatellite genetic baseline facilitated the development of stock-specific coastal migration models for the four largest Atlantic salmon (*Salmo salar*) populations, Målselv, Alta, Tana and Kola rivers, contributing to the Barents Sea mixed-stock fishery. Målselv salmon displayed a restricted coastal movement with 85% of the fish captured within 20 km of their natal river. Kola salmon also demonstrated limited coastal movements in Norwegian waters, with most (> 90%) caught in eastern Finnmark. Multi-sea-winter (MSW) Alta salmon were caught west of Alta fjord across a broader stretch of coast while one-sea-winter (1SW) fish migrated more extensively along the coast prior to river entry. Tana salmon, however, were detected over a broad expanse (600 km) of the North-Norwegian coast. For all populations MSW salmon dominating catches earlier in the season (May–June) while 1SW fish were more common from July to August. This study provides an example of how traditional catch and effort information may be combined with genetic methods to obtain insights into spatial and temporal changes in Atlantic salmon catch composition and their associated migration patterns in a mixed-stock coastal fishery.

**Keywords:** Atlantic salmon, Barents Sea, coastal fishery, genetics, migration models, salmon stock origin

## Introduction

One of the greatest challenges for the management and conservation of fish species whose populations comingle during ocean migration and feeding (e.g. Atlantic and Pacific salmon) involves understanding the spatial and temporal use of marine coastal environments and the identification of stocks that contribute to

coastal mixed-stock fisheries (Hess *et al.*, 2014; Satterthwaite *et al.*, 2014; Gilbey *et al.*, 2017). This is particularly relevant for managing Atlantic salmon populations originating from the rivers along the Kola Peninsula, White Sea, and as far east as the Pechora River that may be heavily exploited and contributes to the fisheries in northern Norway (Svenning and Prusov, 2011).

Furthermore, the Atlantic salmon sea-fishery in northern Norway, and especially in Finnmark County, has a long cultural tradition, and any reduction in the fishery must be balanced against the need to preserve the rich tradition and local economic importance of the resource (Crozier *et al.*, 2004).

The feasibility of using genetic techniques to discriminate among different salmon stocks depends on the degree of isolation among the populations or regions (Griffiths *et al.*, 2010), the diversity and numbers of markers used (Jeffery *et al.*, 2018), and whether there is sufficient representation of the spatial genetic diversity in the genetic baseline (Bradbury *et al.*, 2015). Until recently it was only possible to identify the region of origin of wild Atlantic salmon contributing to mixed-stock coastal fisheries. Genetic stock identification (GSI) methods have been used to define the home region of Atlantic salmon contributing to past (e.g. Faroes—Gilbey *et al.*, 2017) or current ocean fisheries (Labrador—Bradbury *et al.*, 2015; West Greenland—Bradbury, Hamilton, Sheehan, *et al.*, 2016; Northwest Atlantic, St. Pierre and Miquelon—Bradbury, Hamilton, Chaput, *et al.*, 2016), as means of identifying incidental captures of salmon in coastal waters (Iceland—Olafsson *et al.*, 2016), on small geographic scales, as an evaluative technique to validate management decisions and more precisely exploit single stocks capable of maintaining a harvestable surplus (Ensing *et al.*, 2013). Elsewhere, GSI methods have been used to examine spatial and temporal distributions, stock composition, abundance, and migration pathways of various species of Pacific salmon species (*Oncorhynchus* spp.) (Beacham *et al.*, 2014; Clemento *et al.*, 2014; Satterthwaite *et al.*, 2014). Further refinements to GSI methods now allowed identification of the natal river with a high degree of certainty (Ozerov *et al.*, 2017; Vähä *et al.*, 2017; Bradbury *et al.*, 2018). For North Norway and Russia, a comprehensive genetic baseline for Atlantic salmon populations has been developed (Ozerov *et al.*, 2017), making it possible to identify the home region of salmon captured in the North-Norwegian coastal fisheries and in most cases to determine the natal river of origin (Ozerov *et al.*, 2017).

Atlantic salmon (*Salmo salar*) have a complex life cycle, spending their first years as juveniles in freshwater, and then migrating to the open sea to feed and grow for 1–5 years before returning to their natal river to spawn (Mills, 1989). Rivers in northernmost Norway, Finland, and Russia, i.e. in the Barents Sea basin, support some of the world's largest wild Atlantic salmon stocks, and salmon in these areas have high socio-economic value associated with commercial, subsistence, and recreational fisheries (Svenning and Prusov, 2011). The total catch from coastal and riverine fisheries in this area during the last 10–15 years (2005–2018) constitutes >50% of the total harvest of wild Atlantic salmon in the world (ICES, 2018). Although a few of these salmon stocks have suffered from reduced numbers of spawners in recent decades, most of them are unique insofar as the majority have not declined, and currently retain a high level of production, especially when compared to southern populations (Zubchenko *et al.*, 1994; Svenning and Prusov, 2011; Zubchenko and Prusov, 2011; Ozerov *et al.*, 2017; Anon., 2018; ICES, 2018). The conservation and sound management of these stocks is important given their size, contribution to fisheries, and diversity of life-history forms (Erkinaro *et al.*, 2019). For example, the average annual landings of the North-Norwegian multi-stock Atlantic salmon coastal fishery over the last 20 years (1998–2017) have varied between 110 and 345 tonnes and are on par with the total in-river

landings from the hundreds of North-Norwegian and Kola Peninsula salmon rivers in the Barents Sea ([www.ssb.no](http://www.ssb.no); Table 08991).

A key element in the life history of Atlantic salmon is natal homing, which serves to maintain reproductively isolated stocks and local adaptation through natural selection (García de Leániz *et al.*, 2007; King *et al.*, 2007). Divergent selection on heritable traits enhancing the survival and reproductive success of individuals under differing physical and biotic determinants has led to significant variation in many morphological and life-history traits, as well as in behavioural characteristics within and among populations (reviewed in García de Leániz *et al.*, 2007). As a result, Atlantic salmon inhabiting different rivers have accumulated significant inter-population genetic variation with high levels of differentiation at sub-basin levels, for instance between tributary populations of Atlantic salmon in the River Tana (Vähä *et al.*, 2007, 2017). This genetic divergence provides the basis for the use of genetic techniques to identify the population origin of individuals.

The aim of this study was to develop a temporal and spatial stock-specific migration model for four of the largest Barents Sea Atlantic salmon populations, i.e. the Målselv, Alta, and Tana (Norway) and Kola (Russia) salmon based on a mass sampling of wild Atlantic salmon caught in the sea fisheries along the North-Norwegian coast in 2011 and 2012. The approach is analogous to those that have used GSI and relative abundance from catch-per-unit effort (CPUE) data to determine distributions and seasonal migrations of various Chinook (*Oncorhynchus tshawytscha*) and sockeye salmon (*Oncorhynchus nerka*) stocks along the west coast of North America (Beacham *et al.*, 2014; Satterthwaite *et al.*, 2014; Bellinger *et al.*, 2015). In addition to providing a more comprehensive understanding of the direction and timing of the coastal movements of returning Atlantic salmon, results from this study will also assist in providing a more precise, and informed regulatory regime for the management of Barents Sea Atlantic salmon stocks.

## Material and methods

### Sampling of adult Atlantic salmon

A total of 17 383 adult wild Atlantic salmon were sampled in 2011 and 2012 (Table 1) along ~950 km of the North-Norwegian coast from 12.5 to 30.5°E and 67.5 to 69.5°N (Figure 1). Samples were obtained from 58 Norwegian Environment Agency licenced professional fishers who employed commercial fishing gears (bend nets and/or bag nets) and were allowed to fish beyond the official fishing season, i.e. from early May until early September in these 2 years (Svenning *et al.*, 2014).

Numbers of Atlantic salmon caught, location, capture method, and date were recorded. Fork length (FL, cm) and body mass (g) were measured and a scale sample was taken for: (i) age and growth determination, (ii) genetic analysis, and (iii) establishing the frequency of escaped farmed fish in the catch. Based on scale pattern analysis fish were categorized as wild or escaped farmed fish, with only wild fish being subsequently used for genetic analysis.

### Genetic analyses

Total genomic DNA was extracted from the scales of 16 096 (92.6%) wild fish (Table 1) using protocols described in Ozerov *et al.* (2017) and surveyed for genetic variation at 31

microsatellite DNA loci identified and applied in previous studies (Ellis *et al.*, 2011; Vähä *et al.*, 2017). Genotype data were generated at University of Turku, Finland, and the Institute of Marine Research, Norway, and cross-calibrated and compared (Ozerov *et al.*, 2017). The amplification procedure was only slightly modified from Vähä *et al.* (2008), where the genotyping error rate for the described procedure was estimated to be low (<0.4%). To minimize genotyping errors, electropherograms and allele scores were reviewed by two persons independently. Furthermore, all genotype calls were subjected to manual checking by two persons independently. The genotyping quality threshold was initially set to having 29 of 31 loci producing unambiguous data with failure resulting in re-analysis from either the DNA extraction or PCR

amplification step. Samples showing evidence of contamination were re-extracted using single scale and re-genotyped. If contamination persisted, the sample was discarded. Furthermore, samples were screened for cross-contamination using the percentage of alleles that matched between pairs of multilocus genotypes in the Microsatellite Toolkit for Excel (Park, 2001). If two individuals shared >95% of alleles in 27–31 loci, they were considered as cross-contaminated. If both samples of the pair were provided by the same fisher the sample with less complete information or later reported sampling time was discarded. In all other cases, both samples were discarded.

# Genetic stock identification

River of origin for each successfully genotyped adult individual was estimated using the Bayesian GSI methodology described in Pella and Masuda (2001) and implemented in cBayes 5.0.1 (Neaves *et al.*, 2005). Genetic information on 185 Atlantic salmon populations spanning from the R. Pechora (Russia) in the East to the R. Beiarelv (Norway) in the West was used as baseline population data, described in Ozerov *et al.* (2017). The advantages of the Bayesian method when compared to the conditional maximum likelihood approach (e.g. in ONCOR, Kalinowski *et al.*, 2008) for GSI have been illustrated in earlier studies (Beacham *et al.*, 2005; Koljonen *et al.*, 2005; Ozerov *et al.*, 2017; Vähä *et al.*, 2017). Of particular note is the fact that the Bayesian approach provides more accurate estimates in the power analysis of the applied baseline genetic data (see Ozerov *et al.*, 2017).

Stock estimates were expected to be affected by the population composition of the mixture sample since GSI methods utilize

**Table 1.** Number and CPUE of wild Atlantic salmon captured monthly in the extended coastal fishery in Northern Norway in 2011 and 2012, and the numbers of Atlantic salmon genotyped.

| Year  | Wild adult salmon  | May   | June  | July  | Aug   | Sep | Total  |
|-------|--------------------|-------|-------|-------|-------|-----|--------|
| 2011  | # Salmon captured  | 783   | 2 539 | 3 435 | 511   | 9   | 7 277  |
|       | CPUE               | 1.55  | 4.68  | 7.88  | 2.22  |     | 3.91   |
|       | # Salmon genotyped | 757   | 2 391 | 2 958 | 479   | 4   | 6 589  |
|       | CPUE               | 0.85  | 6.68  | 7.46  | 2.51  |     | 4.33   |
| 2012  | # Salmon captured  | 381   | 3 989 | 4 335 | 1 353 | 48  | 10 106 |
|       | CPUE               | 0.85  | 6.68  | 7.46  | 2.51  |     | 4.33   |
|       | # Salmon genotyped | 368   | 3 750 | 4 094 | 1 254 | 41  | 9 507  |
|       | CPUE               | 1.16  | 5.82  | 7.64  | 2.40  |     | 4.15   |
| Total | # Salmon captured  | 1 164 | 6 528 | 7 770 | 1 864 | 57  | 17 383 |
|       | CPUE               | 1.16  | 5.82  | 7.64  | 2.40  |     | 4.15   |
|       | # Salmon genotyped | 1 125 | 6 141 | 7 052 | 1 733 | 45  | 16 096 |

CPUE in September was not calculated, since only five localities were fished in this month, and only for a few days.

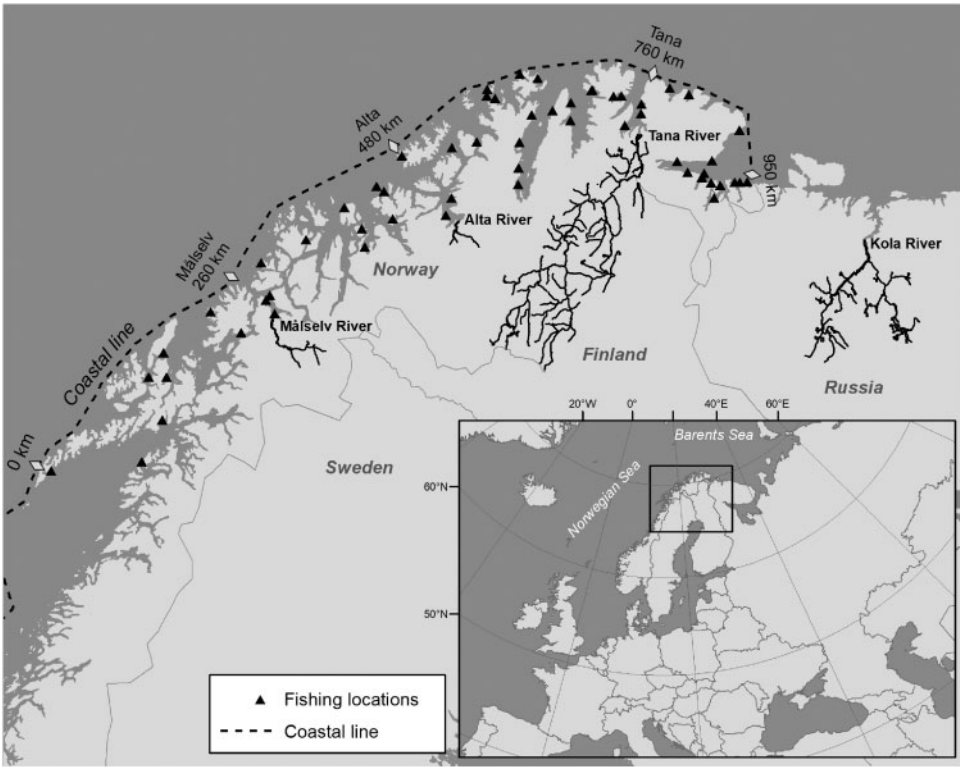

**Figure 1.** Map showing the outer Norwegian coast line (stippled line), the 58 fishing locations (triangle dots), and the four rivers (Målselv, Alta, Tana, and Kola) featured in this study.

**Table 2.** Coastal fishery samples arranged in 88 subsets for GSI analyses based on their spatial and temporal distribution (1: May–June; 2: July–August).

| Region name            | Year<br>Period | 2011  |       | 2012  |       | Total  |
|------------------------|----------------|-------|-------|-------|-------|--------|
|                        |                | 1     | 2     | 1     | 2     |        |
| 1—Sør-Varanger—East    |                | 295   | 96    | 407   | 117   | 915    |
| 2—Sør-Varanger—West    |                | 657   | 567   | 548   | 651   | 2 423  |
| 3—Nesseby—Fjord        |                | 151   | 146   | 159   | 234   | 690    |
| 4—Vadsø                |                | 130   | 247   | 180   | 274   | 831    |
| 5—Vardø                |                | 50    | 91    | 47    | 81    | 269    |
| 6—Båtsfjord—Berlevåg   |                | 90    | 51    | 105   | 86    | 332    |
| 7—Tana                 |                | 80    | 6*    | 78    | 179   | 343    |
| 8—Gamvik               |                | 131   | 253   | 6*    | 12    | 402    |
| 9—Lebesby              |                | 168   | 229   | 129   | 539   | 1 065  |
| 10—Nordkapp—Outer      |                | 100   | 85    | 116   | 425   | 726    |
| 11—Nordkapp—Inner      |                | 15    | 8*    | 233   | 192   | 448    |
| 12—Porsanger           |                |       |       | 26    | 327   | 353    |
| 13—Måsøy               |                | 9*    | 46    | 147   | 122   | 324    |
| 14—Kvalsund—Hammerfest |                | 81    | 73    | 38    | 59    | 251    |
| 15—Hasvik              |                | 108   | 45    | 123   | 30    | 306    |
| 16—Loppa               |                | 83    | 126   | 139   | 232   | 580    |
| 17—Alta                |                | 44    | 254   | 123   | 202   | 623    |
| 18—N.-Troms—Inner      |                | 187   | 287   | 236   | 420   | 1 130  |
| 19—N.-Troms—Outer      |                |       |       | 86    | 144   | 230    |
| 20—S.-Troms—North out  |                | 281   | 166   | 162   | 155   | 764    |
| 21—S.-Troms—Middle out |                | 313   | 481   | 480   | 624   | 1 898  |
| 22—S.-Troms—Middle in  |                | 79    | 86    | 158   | 113   | 436    |
| 23—Nordland—North      |                | 59    | 63    | 108   | 44    | 274    |
| 24—Nordland—South      |                | 37    | 35    | 284   | 127   | 483    |
| Total                  |                | 3 148 | 3 441 | 4 118 | 5 389 | 16 096 |

Samples with low number of individuals (\*) were combined within a year and region.

this information (Pella and Masuda, 2001). Thus, dividing large mixture samples into subsets based on location, time or life-history characteristics of individuals may be beneficial to improve the sensitivity of stock estimates (Vähä *et al.*, 2017). As the number of fishery catch samples of adult wild Atlantic salmon from each of the 58 localities per month of each year were small, they were grouped into 24 analysis regions and two time periods within each sampling year: period 1 (May–June) and period 2 (July–August). Collectively, the 16 096 samples were divided into 88 temporally and spatially distinct subsets for analysis, including four subsets, which were combined within each year (Table 2, Figure 1). GSI analyses were performed using five independent chains of 100 K iterations starting from three random stocks in cBayes 5.0.1 (Neaves *et al.*, 2005). These specifications appeared sufficient as sample-wise Raftery–Lewis diagnostics (Lewis and Raftery, 1997) of the preliminary test runs suggested that 40–80 K iterations were adequate to reach an Markov chain Monte Carlo (MCMC) convergence. The last 10 K iterations of each chain were combined and used to estimate individual assignment to the population (river) of origin to remove the influence of initial starting values, with data for  $n = 5448$  individuals from the Målselv, Alta, Kola, and Tana rivers retained for further analysis (Table 2).

Following Vähä *et al.* (2011, 2014) and Bradbury *et al.* (2015) the probability ( $p$ ) threshold for assignment of an individual to a population was  $\geq 0.7$  and was applied to all four stocks (Alta, Målselv, Kola, and Tana).

## Catch data and statistical analyses

Along with the location of capture, fishers provided daily information on when the fishing gear was set and hauled. To calculate CPUE, we combined the catch data (data on individual fish) with the data on fishing effort (reported from individual fishers). Because effort was regulated by a maximum allowed number of fishing days per week, week was used as the basic unit in the calculations. Thus, weekly CPUE was calculated as the number of fish caught during a week divided by the number of fishing days in the same week. Weekly CPUE data were averaged over months to provide monthly maps of CPUE by region of origin.

Catch data for each of the four river systems were used to model the inshore migration pattern of wild Atlantic salmon. Initial analyses and visual inspection of the data suggested that the migration patterns in 2011 and 2012 were similar (Svenning *et al.*, 2014). Therefore, to investigate the general pattern of migration, irrespective of year, we combined data from both years in the analyses. Initial analyses also suggested differences in the timing of migration for different sea age classes. Consequently, we modelled one sea-winter (1SW) and multi-sea-winter (MSW) separately.

We used Generalized Additive Models (GAMs) from the “mgcv” library (Wood, 2006) in R v.2.13.0 (R Development Core Team, 2011) to model how the CPUE of Atlantic salmon from different rivers and age classes changed geographically over time. Weekly CPUE of 1SW and MSW (CpueS) originating from the four study rivers were modelled as dependent variables using a negative binomial distribution and a log-link function. Fishing location and time in the fishing season were used as independent variables. Fishing location was defined by a two-dimensional coordinate system where Axis 1 (CoastY) is the distance (in km) along the outer Norwegian coastline (Figure 1) from the southwestern limit of the study area to the fishing location, and Axis 2 (CoastX) is the inshore–offshore gradient defined by the perpendicular distance (in km) from the fishing location to the outer coastline. The time in the fishing season (Time) was defined by the week number beginning 1st May. The CpueS was modelled with a three-dimensional smoothing function dependent on CoastX, CoastY, and Time using thin plate regression splines (Wood, 2006). Based on the fitted models, we used the “predict” function in the “mgcv” library to predict the average spatial distribution for a given week on a  $2 \times 2$  km<sup>2</sup> grid covering the area inshore of the outer coastline from Nordland county (ca. 12.5°E, 30.5°E, 67.5°N) in the southwest to the Norwegian border to Russia in the northeast (69.5°N). The area covered all fishing locations as shown in Figure 1.

## Results

### Genetic stock identification

In total, 11 320 of the 16 096 genotyped individuals could be assigned to specific rivers (cut-off  $p \geq 0.7$ ). The cut-off at  $p \geq 0.7$  was supported by analysing a limited set of 27 Carlin-tagged Alta salmon presented in Vähä *et al.* (2014) which allowed reaching the accuracy of >90% while keeping 88% of the samples (Table 3). Thus, of the 11 320 salmon that could be identified to river of origin, 4527 were assigned to the four large rivers included in this study (see Table 4), while the remaining 6793 fish were assigned to another 134 rivers spread from southern Nordland, Norway, to Pechora area, Russia (see Figure 1, Ozerov *et al.*, 2017).



**Table 3.** GSI of tagged adult salmon, originating from the River Alta and caught in North-Norwegian coastal fisheries in 2011.

| ID            | Assigned to          | <i>p</i> | Catch region           | Date of catch | Tag ID    |
|---------------|----------------------|----------|------------------------|---------------|-----------|
| Kola201104208 | R. Alta              | 1.000    | 18—N.-Troms—Inner      | 6 July 2011   | NL-051256 |
| Kola201104803 | R. Alta              | 0.593    | 18—N.-Troms—Inner      | 19 July 2011  | NK-046305 |
| Kola201105386 | R. Alta              | 0.999    | 10—Nordkapp—Outer      | 19 July 2011  | NL-021595 |
| Kola201106148 | R. Alta              | 0.999    | 22—S.-Troms—Middle in  | 4 July 2011   | NL-032207 |
| Kola201106286 | R. Mandalselva       | 0.928    | 22—S.-Troms—Middle in  | 12 July 2011  | NL-23355  |
| Kola201106290 | R. Alta              | 0.996    | 22—S.-Troms—Middle in  | 13 July 2011  | NL-001633 |
| Kola201106304 | R. Alta              | 0.996    | 22—S.-Troms—Middle in  | 19 July 2011  | NK-099517 |
| Kola201106435 | R. Alta              | 0.933    | 14—Kvalsund—Hammerfest | 26 July 2011  | NL-031834 |
| Kola201106497 | R. Klokkelv          | 0.371    | 15—Hasvik              | 27 July 2011  | NK-053352 |
| Kola201106790 | R. Alta              | 1.000    | 22—S.-Troms—Middle in  | 26 July 2011  | NL-022404 |
| Kola201106833 | R. Alta              | 0.998    | 22—S.-Troms—Middle in  | 27 July 2011  | NK-099170 |
| Kola201107005 | R. Skøelv            | 0.422    | 21—S.-Troms—Middle out | 28 July 2011  | NL-24089  |
| Kola201107075 | R. Alta              | 1.000    | 18—N.-Troms—Inner      | 2 August 2011 | NL-029309 |
| Kola201107671 | R. Alta              | 1.000    | 17—Alta                | 15 July 2011  | NL-030938 |
| Kola201107688 | R. Alta              | 0.998    | 17—Alta                | 19 July 2011  | NL-097074 |
| Kola201107693 | R. Alta              | 1.000    | 17—Alta                | 20 July 2011  | NL-030889 |
| Kola201107808 | R. Alta              | 0.999    | 17—Alta                | 3 August 2011 | NK-042475 |
| Kola201107841 | R. Alta              | 1.000    | 17—Alta                | 29 July 2011  | NK-044284 |
| Kola201108212 | R. Alta              | 0.999    | 17—Alta                | 6 July 2011   | NL-029568 |
| Kola201108280 | R. Alta              | 1.000    | 17—Alta                | 8 August 2011 | NL-030511 |
| Kola201108281 | R. Alta              | 1.000    | 17—Alta                | 8 August 2011 | NL-000872 |
| Kola201108286 | R. Alta              | 1.000    | 17—Alta                | 9 August 2011 | NK-097353 |
| Kola201105064 | R. Alta              | 1.000    | 16—Loppa               | 6 July 2011   | NL-027274 |
| Kola201107788 | R. Alta              | 0.996    | 17—Alta                | 26 July 2011  | NL-028834 |
| Kola201107061 | R. Salangsvassdraget | 0.954    | 18—N.-Troms—Inner      | 28 July 2011  | NL-027515 |
| Kola201107859 | R. Alta              | 1.000    | 17—Alta                | 12 July 2011  | NL-027909 |
| Kola201106724 | R. Alta              | 0.970    | 22—S.-Troms—Middle in  | 13 July 2011  | NL-028865 |

**Table 4.** Number of wild Atlantic salmon captured in coastal areas of Northern Norway in 2011 and 2012 assigned to the Målselv, Alta, Tana, and Kola Rivers with an assignment probability threshold  $p \geq 0.7$ .

|       |                | Målselv |     |       | Alta |     |       | Tana |     |       | Kola |     |       | Total |       |       |
|-------|----------------|---------|-----|-------|------|-----|-------|------|-----|-------|------|-----|-------|-------|-------|-------|
|       |                | 1SW     | MSW | Total | 1SW  | MSW | Total | 1SW  | MSW | Total | 1SW  | MSW | Total | 1SW   | MSW   | Total |
| 2 011 | May–June       | 18      | 223 | 241   | 14   | 69  | 83    | 43   | 275 | 318   | 37   | 109 | 146   | 112   | 676   | 788   |
|       | July–September | 176     | 82  | 258   | 337  | 212 | 549   | 147  | 52  | 199   | 144  | 15  | 159   | 804   | 361   | 1 165 |
|       | Total          | 194     | 305 | 499   | 351  | 281 | 632   | 190  | 327 | 517   | 181  | 124 | 305   | 916   | 1 037 | 1 953 |
| 2 012 | May–June       | 54      | 264 | 318   | 6    | 188 | 194   | 136  | 313 | 449   | 35   | 84  | 119   | 231   | 849   | 1 080 |
|       | July–September | 314     | 159 | 473   | 240  | 312 | 552   | 223  | 100 | 323   | 125  | 21  | 146   | 902   | 592   | 1 494 |
|       | Total          | 368     | 423 | 791   | 246  | 500 | 746   | 359  | 413 | 772   | 160  | 105 | 265   | 1 133 | 1 441 | 2 574 |
| Total | May–June       | 72      | 487 | 559   | 20   | 257 | 277   | 179  | 588 | 767   | 72   | 193 | 265   | 343   | 1 525 | 1 868 |
|       | July–September | 490     | 241 | 731   | 577  | 524 | 1 101 | 370  | 152 | 522   | 269  | 36  | 305   | 1 706 | 953   | 2 659 |
|       | Total          | 562     | 728 | 1 290 | 597  | 781 | 1 378 | 549  | 740 | 1 289 | 341  | 229 | 570   | 2 049 | 2 478 | 4 527 |

### Total catches

The total catches of wild salmon ( $n = 17\,383$ , Table 1) were dominated by 1SW (41.6%) and 2SW (41.0%) fish, while 3–5 SW salmon constituted 17.4% of the catch. Catches in May and June were dominated by MSW (2–5 SW; 82%) salmon, while 1SW salmon were more commonly captured in July–September (61%). Catches of both 1SW and MSW salmon decreased during August.

The catch per unit of effort (weekly CPUE) varied from 0 to 23.5, while the average CPUE of wild salmon (May–August) in 2011 (3.91) and 2012 (4.33) was similar ( $t$ -test,  $p = 0.43$ ; Table 1). Highest CPUE occurred in July and was lowest in May for both years. September was excluded from CPUE-analysis since very few fishers continued fishing in September, and thus

few Atlantic salmon were caught (Table 1). CPUE varied among localities, with the highest values in mid-Troms (vest of Malangen/Målselv fjord system) and in Finnmark (Figure 1).

### GAMs (Målselv, Alta, Tana, and Kola salmon)

The GAMs of the weekly CPUE as a function of fishing location and the time in the fishing season for the four rivers Målselv, Alta, Tana, and Kola, explained 51 to 91% of the variation in the CPUE data. The three-dimensional smoothing term (CoastX, CoastY, Time) was highly significant in all of the river-specific age group models (Table 5). Predicted values showed strong patterns with a clear peak in catch close to the respective river mouths (Målselv, Alta, and Tana) and increased catches of salmon originating from Kola in the northeast (Figure 2). For all

**Table 5.** Summary of GAM results modelling the weekly CPUE of wild Atlantic salmon as a function of the fishing location (CoastX, CoastY) and the time in the fishing season (Time).

| River origin | Age-group | Estimated degrees of freedom | Estimated residual degrees of freedom | Chi-square | <i>p</i> | Deviance explained (%) |
|--------------|-----------|------------------------------|---------------------------------------|------------|----------|------------------------|
| Målselv      | 1SW       | 15.7                         | 16.6                                  | 277.2      | <0.0001  | 87.2                   |
|              | MSW       | 28.7                         | 33.4                                  | 348.6      | <0.0001  | 91.6                   |
| Alta         | 1SW       | 28.0                         | 33.7                                  | 336.3      | <0.0001  | 75.6                   |
|              | MSW       | 39.8                         | 47.7                                  | 589.7      | <0.0001  | 76.3                   |
| Tana         | 1SW       | 29.3                         | 35.6                                  | 250.3      | <0.0001  | 55.8                   |
|              | MSW       | 38.9                         | 47.1                                  | 368.9      | <0.0001  | 51.7                   |
| Kola         | 1SW       | 9.0                          | 9.0                                   | 150.1      | <0.0001  | 82.5                   |
|              | MSW       | 28.3                         | 34.2                                  | 240.4      | <0.0001  | 69.7                   |

Separate models are shown for each river system and two sea-age-groups. Fishing location and time were modelled with a three-dimensional smooth function [s(CoastX, CoastY, Time)]. CPUE was modelled with a negative binomial distribution with a log-link function. Sample size was 1 176 observations (Atlantic salmon) for each model.

river systems, the GAMs indicated a slightly earlier arrival of MSW salmon compared to 1SW fish. In general, the models indicated that all salmon from the Målselv River arrived directly from the sea and relatively close to the Målselv River mouth, with little evidence of any extensive movement along the coast. This was also partly true for MSW Alta salmon, while 1SW Alta salmon were found to be more spatially spread-out with small local peaks west and east of the Alta River (Figure 2). In contrast, River Tana salmon migrate more extensively along the coast to both the east and west of the Tana Fjord, although the CUPE values were highest in areas closest to the Tana Fjord. Kola salmon showed limited coastal movements in North-Norwegian waters, with most salmon (>90%) caught proximate to the Varanger Fjord, eastern Finnmark, although some MSW fish were noted from Nordland and western Finnmark very early (mid- to late May) in the season.

### Catches of Målselv salmon

MSW fish dominated Målselv salmon catches during May–June (523; 87.3%), while 1SW fish were more common from July to September ( $n = 528$ ; 66.7%). Only MSW-salmon were captured in May, while CPUE increased during late May and remained high until the first week of August and then decreased strongly during mid- to late August (Figure 2). Most 1SW salmon were caught in a limited area located around outer coastal islands west of the Malangen Fjord and in coastal areas proximate to the Målselv River (Figures 1 and 2). Similar catch patterns were observed for MSW-salmon. In total, >85% of Målselv salmon were captured at sea <20 km from the river mouth, and >91% were caught along a rather restricted 60 km stretch of the nearly 950 km long coastal line extending from southwestern Nordland to northeastern Finnmark (see Figures 1 and 2).

### Catches of Alta salmon

MSW Alta salmon dominated in catches during May–June (93.3%), while 1SW and MSW-salmon contributed equally to the catches from June to September (52.6 and 47.4%, respectively; Table 4). The CPUE of MSW Alta salmon increased in western Finnmark during the last week of May, increased towards southwest in mid-June (e.g. Senja and southwards to Lofoten; Figure 1), and overall remained high throughout July and most of August (Figure 2). CPUE of 1SW salmon was moderately high in both western Finnmark and Troms counties from July until

mid-August, with many 1SW Alta-salmon being captured in the southwestern, western, and north-western coastal areas adjacent to the Alta Fjord. The majority of Alta salmon were caught west of the Alta fjord and generally across a broader stretch of the coast by comparison to Målselva salmon. In total, 45% of Alta salmon were captured along a 60 km section of the coast proximate to the Alta River, while 15% were captured >200 km from the Alta fjord.

### Catches of Tana salmon

MSW Tana-salmon were captured along the majority of coastal Troms and Finnmark counties in the beginning of May, with CPUE increasing throughout May and remaining high in the outer coastal areas of Troms and Finnmark throughout June until mid-July (Figure 2). CPUE decreased during the last half of July, and in August only a few MSW salmon were caught in the North-Norwegian coastal area. The CPUE of 1SW salmon increased from the second half of June across a broad region stretching from Lofoten, Nordland, in the southwest to Varanger in the east. The highest catches were recorded along the outer coast of Troms and Finnmark in mid-July, before tapering off in early August. Although many Tana salmon were caught close to the River Tana, with many captured in the Tana Fjord itself, a relatively high fraction were caught both east and west of the Tana Fjord, and even in the same weeks. In total 25% of Tana salmon were captured >250 km east of Tana Fjord, and 40% were captured >300 km west of Tana fjord.

### Catches of Kola salmon

MSW fish dominated the Kola catches in the May–June period (71.3%) whereas 1SW fish dominated in July–September (88.9%). The relative abundance of Kola River salmon, as inferred from CPUE, was close to zero throughout May and early June (Figure 2). From mid-June onwards, CPUE increased in the Varangerfjord (Eastern Finnmark) in the first half of July, before decreasing in late July and August.

MSW salmon were present in the catches in the Varangerfjord from the beginning of May and increased in late May to a mid-July peak before tapering off to the point where they were absent from catches in August. The coastal exploitation of MSW salmon followed a similar geographical pattern as that of the 1SW salmon, with higher CPUE being observed mostly in the Varangerfjord. Some catches of Kola salmon, especially MSW

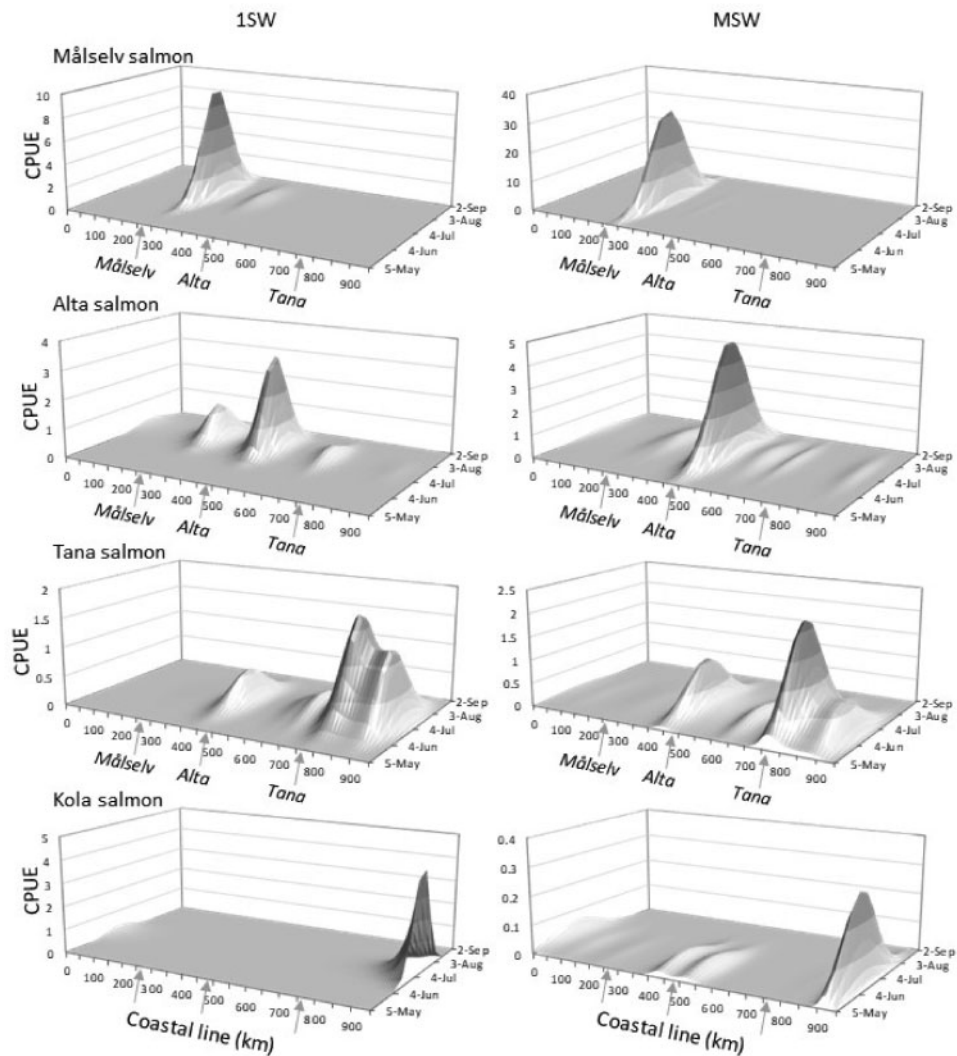

**Figure 2.** Predicted CPUE by week (z-axis) of 1SW and MSW wild Atlantic salmon from Målselv, Alta, Tana, and Kola Rivers along 950 km of the North-Norwegian coast (x-axis) from South-western Nordland to Eastern Finnmark (see Figure 1) from early May to late August (y-axis). The coastal study area corresponds to the dashed line shown on the map in Figure 1. The location of the river mouths along the coast (x-axis) is Målselv, 260 km; Alta, 480 km; Tana, 760 km. The Russian (Kola and White Sea) rivers are found outside the range of the x-axis (i.e. outside the range of the coastal fishing locations).

fish, were also recorded in the May–June period in Nordland and western Finnmark (Figure 2). In total, 92% of Kola salmon were captured within the Varangerfjord, i.e. within a radius of 20 km from the mid-Varangerfjord.

## Discussion

Understanding ocean migrations of highly migratory species such as the Atlantic salmon is challenging as inferences are usually determined from the capture of fish in pelagic research surveys (Reddin and Shearer, 1987; Holm *et al.*, 2000), from the distribution of tag recoveries from surveys or capture fisheries (Jacobsen *et al.*, 2012; Reddin *et al.*, 2012; Downie *et al.*, 2018), or more recently, from biotelemetry methods (Crossin *et al.*, 2014). The latter methods, however, are usually dependent on the spatial and temporal distribution of fishing effort (Jacobsen *et al.*, 2012), with conclusions often based on a limited number of tag recaptures, frequently from only one or a few populations (Ulván

*et al.*, 2018). In this study, stock identification and relative abundance from CPUE data were used to examine stock-specific coastal migration patterns of four of the largest Atlantic salmon populations contributing to the Barents Sea mixed-stock fishery, with coastal movements inferred from over 4500 individual assignments. Furthermore, sample fishing was designed to cover most of the areas along the North-Norwegian coast, and obtain detailed CPUE information from each fisher included in the study with a more prolonged fishing period as compared to the ordinary fishing season. Approaches used here parallel studies that have examined the ocean distribution and relative abundance of Chinook and sockeye salmon stocks along the west coast of North America (Beacham *et al.*, 2014; Bellinger *et al.*, 2015; Satterthwaite *et al.*, 2014), where in some situations the fishing season was also extended to cover a greater period of time stocks could potentially migrate through the region (Satterthwaite *et al.*, 2014).

Combining detailed temporal and spatial catch data, including detailed CPUE information, with a newly developed high-resolution microsatellite genetic baseline for North-Norwegian and Russian origin Atlantic salmon (Ozerov *et al.*, 2017) facilitated the development of stock-specific migration models for the Målselv, Alta, and Tana (Norway) and Kola River (Russia) Atlantic salmon populations. The use of GSI methods combined with stock-specific CPUE data have been shown to provide enhanced information over GSI alone in elucidating migratory patterns in situations where stock origin and relative abundance data are available (Bellinger *et al.*, 2015). Here, the combined use of techniques has provided more detailed understanding of both spatial and temporal migration patterns than either GIS or stock-specific CPUE data could alone. Results showed limited movement along the North-Norwegian coast by returning salmon for the Målselv population prior to river entry, with more extensive movement for fish originating from the River Alta and particularly from the River Tana. Most of Kola salmon (>90%) were captured within the Varangerfjord, ~250 km from the river mouth by coast, whereas some MSW fish were also recorded in Nordland and western Finnmark.

There were also distinct age-specific return peaks for each population with MSW salmon dominating catches earlier in the season (May–June) while 1SW fish were more common from July to September. This is in accordance with several previous studies from Scotland (Shearer, 1992), Norway (Svenning *et al.*, 2017), and the Baltic Sea (Siira *et al.*, 2009), showing a general tendency for earlier coastal return of MSW vs. 1SW salmon. While the recent study of Ulvan *et al.* (2018) found a temporal difference in returns to River Alta, with MSW fish returning earlier than 1SW fish, they found no significant differences in the spatial distribution of age-related recaptures. Ulvan *et al.* (2018) relied recaptures obtained during the regulated fishing season, i.e. lasting 2 weeks in Nordland, 4–6 weeks in Troms, and up to 8 weeks in Finnmark county (see Figure 1). As a result, the spatial fraction of MSW and 1SW salmon in coastal areas estimated by Ulvan *et al.* (2018) may be less representative by comparison to our study where all fishers were given a special licence to fish from the first week of May until early September, i.e. for >17 weeks along the entire North-Norwegian coast. Furthermore, Ulvan *et al.* (2018) had no information on how many days per week the different fishers actually fished, while each fisher had to report daily-CPUE in our study.

Atlantic salmon continue to be harvested at sea as a mixed-stock fishery along coastal regions of the Troms and Finnmark counties in north Norway. Mixed-stock migrations expose fish to common exploitation risks irrespective of existing population-specific viabilities or risks of population collapse such that the exploitation has the potential to differentially weaken populations (Griffiths *et al.*, 2010) because of among-stock differences in characteristics such as run timing (Hess *et al.*, 2014). Thus, it is important to understand the sequential movements of salmon as they migrate back to their natal rivers, especially in areas with well-developed interception fisheries. With improved information mixed-stock fisheries can avoid overharvesting smaller stocks, or those with existing conservation issues (Bradbury *et al.*, 2015; Bradbury, Hamilton, Chaput, *et al.*, 2016) and aid the development of essentially single-stock fisheries as has been documented for the River Foyle, Ireland (Ensing *et al.*, 2013).

The requirement to better understand and resolve stock-specific migration patterns, however, is not unique to ocean

fisheries for Atlantic salmon. GSI methods are becoming integrated into fisheries management for other species, particularly Pacific salmon, where GSI results have been shown to be consistent with those of conventional methods (e.g. coded-wire tags) for understanding run-timing and estimating abundance (Beacham *et al.*, 2014; Hess *et al.*, 2014; Bellinger *et al.*, 2015). Similarly, use of GSI to examine Baltic Sea brown trout (*Salmo trutta*) dispersal and migration routes and rates has been deemed essential for understanding of migration patterns and estimating exploitation rates for fisheries management purposes (Östergren *et al.*, 2016).

Temporal regulations aimed at reducing fishing pressure on wild salmon have utilized knowledge of differential return time in an attempt to optimize management (Siira *et al.*, 2009). Yet, relatively little effort has been directed towards understanding the ocean migrations of Atlantic salmon originating from north Norway and Russia, particularly with respect to the timing and nature of their coastal movements as they return from the broad areas of the north Atlantic known to be used by Norwegian origin Atlantic salmon, e.g. East and West Greenland (Reddin *et al.*, 2012), Icelandic waters (Olafsson *et al.*, 2016), the Norwegian Sea (Holm *et al.*, 2000; Jacobsen *et al.*, 2001, 2012), and high latitude areas in the Eastern Barents Sea and north to Svalbard (Svenning and Ozerov, 2018). An exception is the recent study of Strøm *et al.* (2018) that followed the entire ocean migration of six post-spawned adult Atlantic salmon from the River Alta based on high-resolution light-based geolocation archival tags.

Recaptures of adult salmon tagged as out-migrating hatchery-reared smolts from the several Norwegian rivers have indicated that Atlantic salmon approach the coast from both north and south of their natal rivers (Hansen *et al.*, 1993; Ulvan *et al.*, 2018). Despite the wide geographical dispersion of tag recaptures, the majority of fish in the Ulvan *et al.* (2018) study were caught in areas proximate to the Alta Fjord, particularly the larger MSW fish. Their findings parallel results from this study that noted the return migration of 1SW Alta Atlantic salmon extended over hundreds of kilometres of coastline while MSW Alta Atlantic salmon approached the coast over a more restricted area. Directed, non-random patterns of movement have been noted in other migratory species, including chum salmon, *Oncorhynchus keta*, (Friedland *et al.*, 2001) and striped bass, *Morone saxatilis* (Callihan *et al.*, 2015). Although older evidence for Atlantic salmon suggests fish may first encounter the coast as much as a 1000 km from their river of origin, location of their natal river by trial and error has been ruled out on the basis of migration speeds and abilities to keep an apparent constant compass course close to the surface (see Hansen *et al.*, 1993). The directed nature of returning migrations is similarly highlighted by our CPUE data, with the highest CPUE values of >1500 salmon genetically identified as originating from the Alta River also occurring in areas close to their natal river.

Salmon identified as originating from the River Tana returned over a broad expanse of the North-Norwegian coast although the CUPE values were highest in areas closest to the Tana Fjord. The greater dispersion of returning Tana salmon may, in part, be due to the large diversity inherent within the River Tana stock complex (Vähä *et al.*, 2017; Erkinaro *et al.*, 2019). Several studies have concluded that both genetics and environment influenced migration timing (see Jonsson *et al.*, 2007 and references therein), and in the Baltic, Siira *et al.* (2009) noted large variations in migration patterns and run timing between sea age groups, stock



components and among and within regions. Thus, distinct main stem and tributary populations within the Tana system may reflect variations in life-history attributes, including homeward migration patterns. This is consistent with other studies that have noted salmon of differing sea-ages can use variable oceanic areas that result in fish returning at different times and from different directions (Spares *et al.*, 2007; Dadswell *et al.*, 2010; Ulvan *et al.*, 2018). Variable stock-specific migrations may, therefore, contribute to differences in growth, survival and hence productivity among stocks as noted for populations of sockeye salmon (*O. nerka*) (Beacham *et al.*, 2014).

Understanding temporal patterns of return migrations of differing sea-age classes could assist in managing fisheries to protect the important MSW component. For those populations where MSW are caught earlier in the season, delaying the opening dates of coastal fisheries has the potential to reduce the interception of the larger fish, allowing greater opportunities for them to return to their natal streams. As studies have shown, large dominant MSW salmon have higher reproductive success than smaller conspecifics (Grant *et al.*, 2003) and are consequently more important for the determination of overall population abundance. The strategy was implemented in Newfoundland to reduce the interception of MSW salmon in commercial fisheries with desired effect (O'Connell *et al.*, 1992). Similarly, in the River Foyle, Ireland, understanding derived from GSI has been used to validate fisheries management action plans designed to transform mixed-stock to single-stock fisheries (Ensing *et al.*, 2013), suggesting accurate and precise management rules can be implemented at local scales provided the sort of stock-specific route and timing information derivable from GSI studies is available.

The ability to use GSI procedures to accurately identify river-specific contributions in mixed-stock fisheries is dependent on an adequate genetic baseline and sufficient divergence among populations of interest. In this study, the Kola, Tana, Alta, and Målselv populations could reliably be distinguished owing to their high GSI accuracy (Ozerov *et al.*, 2017). Because of the high GSI accuracy, unsampled (ghost) populations (Bradbury *et al.*, 2015) that were not included within the existing baseline are unlikely to have influenced our results. Therefore, based on the spatial distribution of CPUE of Alta and Målselv salmon, it is doubtful that these stocks are entering Russian waters east of the Varangerfjord, while it is more likely that salmon originating from the River Tana will be found in this area. Salmon fisheries in Russian waters of the Barents Sea are prohibited and the lack of corresponding coastal fishery samples from Russian waters precluded confirmation of Tana (or other) salmon in this area.

The understanding of the timing and movements of these four Barents Sea salmon stocks was derived from 2 years of data, but as noted by Satterthwaite *et al.* (2014) for Chinook salmon, more complex patterns may exist had studies continued over a longer period of years, particularly if oceanic climate conditions differed substantially among years. Nevertheless, this study provides an example of how traditional catch and effort information may be complemented by genetic methods to construct a detailed understanding of spatial and temporal changes in catch composition and hence migration patterns in a mixed-stock coastal Atlantic salmon fishery. Improved spatial and temporal resolution in understanding the pattern of arrival timing provides more precise information that could aid in the design of more informed regulatory regimes for the management and conservation of Atlantic salmon populations in the Barents Sea. Further refinement of

genetic approaches, such as use of single nucleotide polymorphisms (Bourret *et al.*, 2013; Ozerov *et al.*, 2013), or the application of large sequenced microsatellite panels (Bradbury *et al.*, 2018) and the inclusion of additional contributory populations in the genetic baseline would add to the usefulness of the approach applied here to the conservation and management of these important northern Atlantic salmon populations.

## Acknowledgements

We acknowledge the Atlantic salmon fishing organizations in Nordland, Troms, and Finnmark counties, and are especially grateful to the 58 fishers who collected >17 000 wild adult Atlantic salmon along the North-Norwegian coast. We also acknowledge Trond Johansen for help with the figures.

## Funding

The study received financial support from the Kolarctic ENPI CBC project KOI 97, and the Norwegian Research Council (244086/E50).

## References

- Anon. 2018. Status of Wild Atlantic Salmon in Norway 2018. Report From the Norwegian Scientific Advisory Committee for Atlantic Salmon. Appendix 11d. 347 pp (in Norwegian).
- Beacham, T. D., Candy, J. R., McIntosh, B., MacConnachie, C., Tabata, A., Kaukinen, K., and Deng, L. T. 2005. Estimation of stock composition and individual identification of sockeye salmon on a Pacific Rim basis using microsatellite and major histocompatibility complex variation. *Transactions of the American Fisheries Society*, 134: 1124–1146.
- Beacham, T. D., Cox-Rogers, S., MacConnachie, C., McIntosh, B., and Wallace, C. G. 2014. Population structure and run timing of sockeye salmon in the Skeena River, British Columbia. *North American Journal of Fisheries Management*, 34: 335–349.
- Bellinger, M. R., Banks, M. A., Bates, S. J., Crandall, E. D., Garza, J. C., Sylvia, G., and Lawson, P. W. 2015. Geo-referenced, abundance calibrated ocean distribution of Chinook salmon (*Oncorhynchus tshawytscha*) stocks across the West coast of North America. *PLoS One*, 10: e0131276–25.
- Bourret, V., Kent, M. P., Primmer, C. R., Vasemagi, A., Karlsson, S., Hindar, K., and Lien, S. 2013. SNP-array reveals genome-wide patterns of geographical and potential adaptive divergence across the natural range of Atlantic salmon (*Salmo salar*). *Molecular Ecology*, 22: 532–551.
- Bradbury, I. R., Hamilton, L. C., Chaput, G., Robertson, M. J., Goraguer, H., Walsh, A., Morris, V. *et al.* 2016. Genetic mixed stock analysis of an interceptory fishery Atlantic salmon fishery in the Northwest Atlantic. *Fisheries Research*, 174: 234–244.
- Bradbury, I. R., Hamilton, L. C., Rafferty, S., Meerburg, D., Poole, R., Dempson, J. B., Robertson, M. J. *et al.* 2015. Genetic evidence of local exploitation of Atlantic salmon in a coastal subsistence fishery in the Northwest Atlantic. *Canadian Journal of Fisheries and Aquatic Sciences*, 72: 83–95.
- Bradbury, I. R., Hamilton, L. C., Sheehan, T. F., Chaput, G., Robertson, M. J., Dempson, J. B., Reddin, D. *et al.* 2016. Genetic mixed-stock analysis disentangles spatial and temporal variation in composition of the West Greenland Atlantic salmon fishery. *ICES Journal of Marine Science*, 73: 2311–2321.
- Bradbury, I. R., Wringe, B. F., Watson, B., Paterson, I., Horne, J., Beiko, R., Lehnert, S. J. *et al.* 2018. Genotyping-by-sequencing of genome-wide microsatellite loci reveals fine-scale harvest composition in a coastal Atlantic salmon fishery. *Evolutionary Applications*, 11: 918–930.
- Callihan, J. L., Harris, J. E., and Hightower, J. E. 2015. Coastal migration and homing of Roanoke River Striped Bass. *Marine and*

- Coastal Fisheries: Dynamics, Management, and Ecosystem Science, 7: 301–315.
- Clemento, A. J., Crandall, E. D., Garza, J. C., and Anderson, E. C. 2014. Evaluation of a single nucleotide polymorphism baseline for genetic stock identification of Chinook salmon (*Oncorhynchus tshawytscha*) in the California Current large marine ecosystem. Fisheries Bulletin, 112: 112–130.
- Crossin, G. T., Cooke, S. J., Goldbogen, J. A., and Phillips, R. A. 2014. Tracking fitness in marine vertebrates: current knowledge and opportunities for future research. Marine Ecology Progress Series, 496: 1–17.
- Crozier, W. W., Schön, P.-J., Chaput, G. J., Potter, E. C. E., Maoileidigh, N. Ó., and MacLean, J. C. 2004. Managing Atlantic salmon (*Salmo salar* L.) in the mixed stock environment: challenges and considerations. ICES Journal of Marine Science, 61: 1344–1358.
- Dadswell, M. J., Spares, A. D., Reader, J. M., and Stokesbury, M. J. W. 2010. The North Atlantic subpolar gyre and the marine migration of Atlantic salmon *Salmo salar*: the 'Merry-Go-Round' hypothesis. Journal of Fish Biology, 77: 435–467.
- Downie, H., Hanson, N., Smith, G. W., Middlemas, S. J., Anderson, J., Tulett, D., and Anderson, H. 2018. Using historic tag data to infer the geographic range of salmon river stocks likely to be taken by a coastal fishery. Scottish Marine and Freshwater Science, 9, 20 pp.: doi: 10.7489/12095-1.
- Ellis, J. S., Gilbey, J., Armstrong, A., Balstad, T., Cauwelier, E., Cherbonnel, C., Consuegra, S. et al. 2011. Microsatellite standardization and evaluation of genotyping error in a large multipartner research programme for conservation of Atlantic salmon (*Salmo salar* L.). Genetica, 139: 353–367.
- Ensing, D., Crozier, W. W., Boylan, P., O'Maoileidigh, N., and McGinnity, P. 2013. An analysis of genetic stock identification on a small geographical scale using microsatellite markers, and its application in the management of a mixed-stock fishery for Atlantic salmon *Salmo salar* in Ireland. Journal of Fish Biology, 82: 2080–2094.
- Erkinaro, J., Czorlich, Y., Orell, P., Kuusela, J., Lämsman, M., Falkegård, M., Pukkinen, H. et al. 2019. Life history variation across four decades in a diverse population complex of Atlantic salmon in a large subarctic river. Canadian Journal of Fisheries and Aquatic Sciences, 76: 42–55.
- Friedland, K. D., Walker, R. V., Davis, N. D., Myers, K. W., Boehlert, G. W., Urawa, S., and Ueno, Y. 2001. Open-ocean orientation and return migration routes of chum salmon based on temperature data from data storage tags. Marine Ecology Progress Series, 216: 235–252.
- García de Leániz, C., Fleming, I. A., Einum, S., Verspoor, E., Jordan, W. C., Consuegra, S., and Aubin-Horth, N. 2007. A critical review of adaptive genetic variation in Atlantic salmon: implications for conservation. Biological Reviews, 82: 173–211.
- Gilbey, J., Wennevik, V., Bradbury, I. R., Fiske, P., Hansen, L. P., Jacobsen, J. A., and Potter, T. 2017. Genetic stock identification of Atlantic salmon caught in the Faroese fishery. Fisheries Research, 187: 110–119.
- Grant, D., Dodson, J. J., and Bernatchez, L. 2003. Differential reproductive success and heritability of alternative reproductive tactics in wild Atlantic salmon (*Salmo salar* L.). Evolution, 57: 1133–1141.
- Griffiths, A. M., Machado-Schiaffino, G., Dillane, E., Coughlan, J., Horreo, J. L., Bowkett, A. E., Minting, P. et al. 2010. Genetic stock identification of Atlantic salmon (*Salmo salar*) populations in the southern part of the European range. BMC Genetics, 11: 31.
- Hansen, L. P., Jonsson, N., and Jonsson, B. 1993. Oceanic migration of homing Atlantic salmon, *Salmo salar*. Animal Behaviour, 45: 927–941.
- Hess, J. E., Whiteaker, J. M., Fryer, J. K., and Narum, S. R. 2014. Monitoring stock-specific abundance, run timing, and straying of Chinook salmon in the Columbia River using genetic stock identification (GSI). North American Journal of Fisheries Management, 34: 184–201.
- Holm, M., Holst, J. C., and Hansen, L. P. 2000. Spatial and temporal distribution of post-smolts of Atlantic salmon (*Salmo salar* L.) in the Norwegian Sea and adjacent areas. ICES Journal of Marine Science, 57: 955–964.
- ICES. 2018. Report of the Working Group on North Atlantic Salmon (WGNAS), 4–13 April 2018. ICES CM 2018/ACOM: 21, Woods Hole, MA. 386 pp.
- Jacobsen, J. A., Hansen, L. P., Bakkestuen, V., Halvorsen, R., Reddin, D. G., White, J., O'Maoileidigh, N. et al. 2012. Distribution by origin and sea age of Atlantic salmon (*Salmo salar*) in the sea around the Faroe Islands based on analysis of historical tag recoveries. ICES Journal of Marine Science, 69: 1598–1608.
- Jacobsen, J. A., Lund, R. A., Hansen, L. P., and Ó'Maoileidigh, N. 2001. Seasonal differences in the origin of Atlantic salmon (*Salmo salar* L.) in the Norwegian Sea based on estimates from age structures and tag recaptures. Fisheries Research, 52: 169–177.
- Jeffery, N. W., Wringe, B. F., McBride, M. C., Hamilton, L. C., Stanley, R. R. E., Bernatchez, L., Kent, M. et al. 2018. Range-wide regional assignment of Atlantic salmon (*Salmo salar*) using genome wide single-nucleotide polymorphisms. Fisheries Research, 206: 163–175.
- Jonsson, B., Jonsson, N., and Hansen, L. P. 2007. Factors affecting river entry of adult Atlantic salmon in a small river. Journal of Fish Biology, 71: 943–956.
- Kalinowski, S. T., Manlove, K. R., and Taper, M. L. 2008. ONCOR: A Computer Program for Genetic Stock Identification, v.2. Department of Ecology, 310 Lewis Hall, Montana State University, 22 p. <http://www.montana.edu/kalinowski/Software/ONCOR.htm>.
- King, T. L., Verspoor, E., Spindle, A. P., Gross, R., Phillips, R. B., Koljonen, M.-L., Sanchez, J. A. et al. 2007. Biodiversity and population structure. In The Atlantic Salmon: Genetics, Conservation and Management, pp. 117–166. Ed. by E. Verspoor, L. Stradmeyer, and J. Nielsen. Blackwell Publishing Ltd., Oxford. 520 pp.
- Koljonen, M. L., Pella, J. J., and Masuda, M. 2005. Classical individual assignments versus mixture modeling to estimate stock proportions in Atlantic salmon (*Salmo salar*) catches from DNA microsatellite data. Canadian Journal of Fisheries and Aquatic Sciences, 62: 2143–2158.
- Lewis, S. M., and Raftery, A. E. 1997. Estimating Bayes factors via posterior simulation with the Laplace–Metropolis estimator. Journal of the American Statistical Association, 92: 648–655.
- Mills, D. 1989. Ecology and Management of Atlantic Salmon. Chapman and Hall, London/New York.
- Neaves, P. I., Wallace, C. G., Candy, J. R., and Beacham, T. D. 2005. CBayes: Computer Program for Mixed Stock Analysis of Allelic Data. Version v5.01. Free Program Distributed by the Authors Over the Internet Link. <https://www.pac.dfo-mpo.gc.ca/science/facilities-installations/pbs-sbp/mgl-lgm/apps/index-eng.html> (last accessed 5 June 2019).
- O'Connell, M. F., Dempson, J. B., and Reddin, D. G. 1992. Evaluation of the impacts of major management changes in the Atlantic salmon (*Salmo salar* L.) fisheries of Newfoundland and Labrador, Canada, 1984–1988. ICES Journal of Marine Science, 49: 69–87.
- Olafsson, K., Einarsson, S. M., Gilbey, J., Pampoulie, C., Hreggvidsson, G. O., Hjørleifsdóttir, S., and Gudjonsson, S. 2016. Origin of Atlantic salmon (*Salmo salar*) at sea in Icelandic waters. ICES Journal of Marine Science, 73: 1525–1532.
- Östergren, J., Nilsson, J., Lundqvist, H., Dannewitz, J., and Palm, S. 2016. Genetic baseline for conservation and management of sea trout in the northern Baltic Sea. Conservation Genetics, 17: 177–191.

- Ozerov, M., Vähä, J.-P., Wennevik, V., Niemelä, E., Svenning, M.-A., Prusov, S., Fernandez, R. D. *et al.* 2017. Comprehensive microsatellite baseline for genetic stock identification of Atlantic salmon (*Salmo salar*) in northernmost Europe. *ICES Journal of Marine Science*, 74: 2159–2169.
- Ozerov, M., Vasemägi, A., Wennevik, V., Diaz-Fernandez, R., Kent, M., Gilbey, J., Prusov, S. *et al.* 2013. Finding markers that make a difference: DNA pooling and SNP-arrays identify population informative markers for Genetic Stock Identification. *PLoS One*, 8: e82434.
- Park, S. D. E. 2001. Trypanotolerance in West African cattle and the population genetic effects of selection. PhD thesis. University of Dublin, Dublin, Ireland.
- Pella, J., and Masuda, M. 2001. Bayesian methods for analysis of stock mixtures from genetic characters. *Fishery Bulletin*, 99: 151–167.
- R Development Core Team. 2011. R: A Language and Environment for Statistical Computing. R Foundation for Statistical Computing, Vienna, Austria.
- Reddin, D. G., Hansen, L. P., Bakkestuen, V., Russel, I., White, J., Potter, E. C. E., Dempson, J. B. *et al.* 2012. Distribution and biological characteristics of Atlantic salmon (*Salmo salar*) at Greenland based on the analysis of historical tag recoveries. *ICES Journal of Marine Science*, 69: 1589–1597.
- Reddin, D. G. and Shearer, W. M. 1987. Sea-surface temperature and distribution of Atlantic salmon in the Northwest Atlantic Ocean. *Common Strategies of anadromous and catadromous fishes. American Fisheries Society Symposium*, 1: 262–275.
- Satterthwaite, W. H., Mohr, M. S., O'Farrell, M. R., Anderson, E. C., Banks, M. A., Bates, S. J., Bellinger, M. R. *et al.* 2014. Use of genetic stock identification data for comparison of the ocean spatial distribution, size at age, and fishery exposure of an untagged stock and its indicator: California Coastal versus Klamath River Chinook salmon. *Transactions of the American Fisheries Society*, 143: 117–133.
- Shearer, W. M. 1992. *The Atlantic Salmon: Natural History, Exploitation and Future Management*. Fishing News Books, Oxford.
- Siira, A., Erkinaro, J., Suuronen, P., and Jounela, P. 2009. Run timing and migration routes of returning Atlantic salmon in the Northern Baltic Sea: implications for fisheries management. *Fisheries Management and Ecology*, 16: 177–190.
- Spares, A. D., Reader, J. M., Stokesbury, M. J. W., McDermott, T., Zikovskiy, L., Avery, T. S., and Dadswell, M. J. 2007. Inferring marine distribution of Canadian and Irish Atlantic salmon (*Salmo salar* L.) in the North Atlantic Ocean from tissue concentrations of bioaccumulated caesium-137. *ICES Journal of Marine Science*, 64: 394–404.
- Strøm, J. F., Thorstad, E. B., Hedger, R. D., and Rikardsen, R. H. 2018. Revealing the full ocean migration of individual Atlantic salmon. *Animal Biotelemetry*, 6: 1–16.
- Svenning, M. A., Falkegård, M., Fauchald, P., Yoccoz, N., Niemelä, E., Vähä, J.-P., Ozerov, M. *et al.* 2014. Region- and stock-specific catch and migration models of Barents Sea salmon. Report ENPI CBC—Kolarctic Salmon Project (KO197). 95 pp. <https://prosjekt.fylkesmannen.no/Kolarcticsalmon/Documents/Reports/Scientific-reports/> (Report—Working paper on exploitation and migration models).
- Svenning, M. A., Lamberg, A., Dempson, B., Strand, R., Hanssen, Ø. K., and Fauchald, P. 2017. Incidence and timing of wild and escaped farmed Atlantic salmon (*Salmo salar*) in Norwegian rivers inferred from video surveillance monitoring. *Ecology of Freshwater Fish*, 26: 360–370. doi: 10.1111/eff.12280.
- Svenning, M. A., and Ozerov, M. 2018. Adult Atlantic salmon captured in Adventfjord, Svalbard. Where are their origin rivers? Final report (2011–2016), Svalbard Environmental Protection Fund. NINA Report, 1496. 20 pp (in Norwegian).
- Svenning, M. A., and Prusov, S. 2011. Atlantic salmon. In *The Barents Sea. Ecosystem, Resources, Management. Half a Century of Russian–Norwegian Cooperation*, pp. 363–372. Ed. by T. Jakobsen and V. K. Ozhigin. Tapir Akademisk, Trondheim, Norway. 825 pp.
- Ulván, E. M., Foldvik, A., Jensen, A. J., Finstad, B., Thorstad, E. B., Rikardsen, A. H., and Næsje, T. F. 2018. Return migration of adult Atlantic salmon (*Salmo salar* L.) to northern Norway. *ICES Journal of Marine Science*, 75: 653–661.
- Vähä, J.-P., Erkinaro, J., Falkegård, M., Orell, P., and Niemelä, E. 2017. Genetic stock identification of Atlantic salmon and its evaluation in a large population complex. *Canadian Journal of Fisheries and Aquatic Sciences*, 74: 327–338.
- Vähä, J.-P., Erkinaro, J., Niemelä, E., and Primmer, C. R. 2007. Life-history and habitat features influence the within-river genetic structure of Atlantic salmon. *Molecular Ecology*, 16: 2638–2654.
- Vähä, J.-P., Erkinaro, J., Niemelä, E., and Primmer, C. R. 2008. Temporally stable genetic structure and low migration in an Atlantic salmon population complex: implications for conservation and management. *Evolutionary Applications*, 1: 137–154.
- Vähä, J.-P., Erkinaro, J., Niemelä, E., Primmer, C. R., Saloniemi, I., Johansen, M., Svenning, M.-A. *et al.* 2011. Temporally stable population-specific differences in run timing of one-sea-winter Atlantic salmon returning to a large river system. *Evolutionary Applications*, 4: 39–53.
- Vähä, J.-P., Wennevik, V., Ozerov, M., Diaz Fernandez, R., Unneland, L., Haapanen, K., Niemelä, E. *et al.* 2014. Genetic structure of Atlantic salmon in the Barents region and genetic stock identification of coastal fishery catches from Norway and Russia. Kolarctic ENPI CBC—Kolarctic salmon project (KO197) Genetireport. 95 pp.
- Wood, S. N. 2006. *Generalized Additive Models: An Introduction with R*. Chapman and Hall/CRC, Boca Raton, FL.
- Zubchenko, A. V., Loenko, A. A., Popov, N. G., Antonova, P., and Valetov, V. A. 1994. Fishery for and Status of Atlantic Salmon Stocks in North-West Russia in 1994. *ICES CM: M*. 40 pp.
- Zubchenko, A. V., and Prusov, S. V. 2011. *Inventory of Salmon Rivers of Murmansk Region. Barents Sea Basin*, PINRO Press, Murmansk.

Handling editor: Daniel Gomez-Uchida
